# Supplementary material for: First Report of Complete Mitochondrial Genome in the Tribes Coomaniellini and Dicercini (Coleoptera: Buprestidae) and Phylogenetic Implications
Source: MDPI journal article supplement (doi:10.3390/genes13061074), 2022-06-16
Supplement: s1 [file s1]

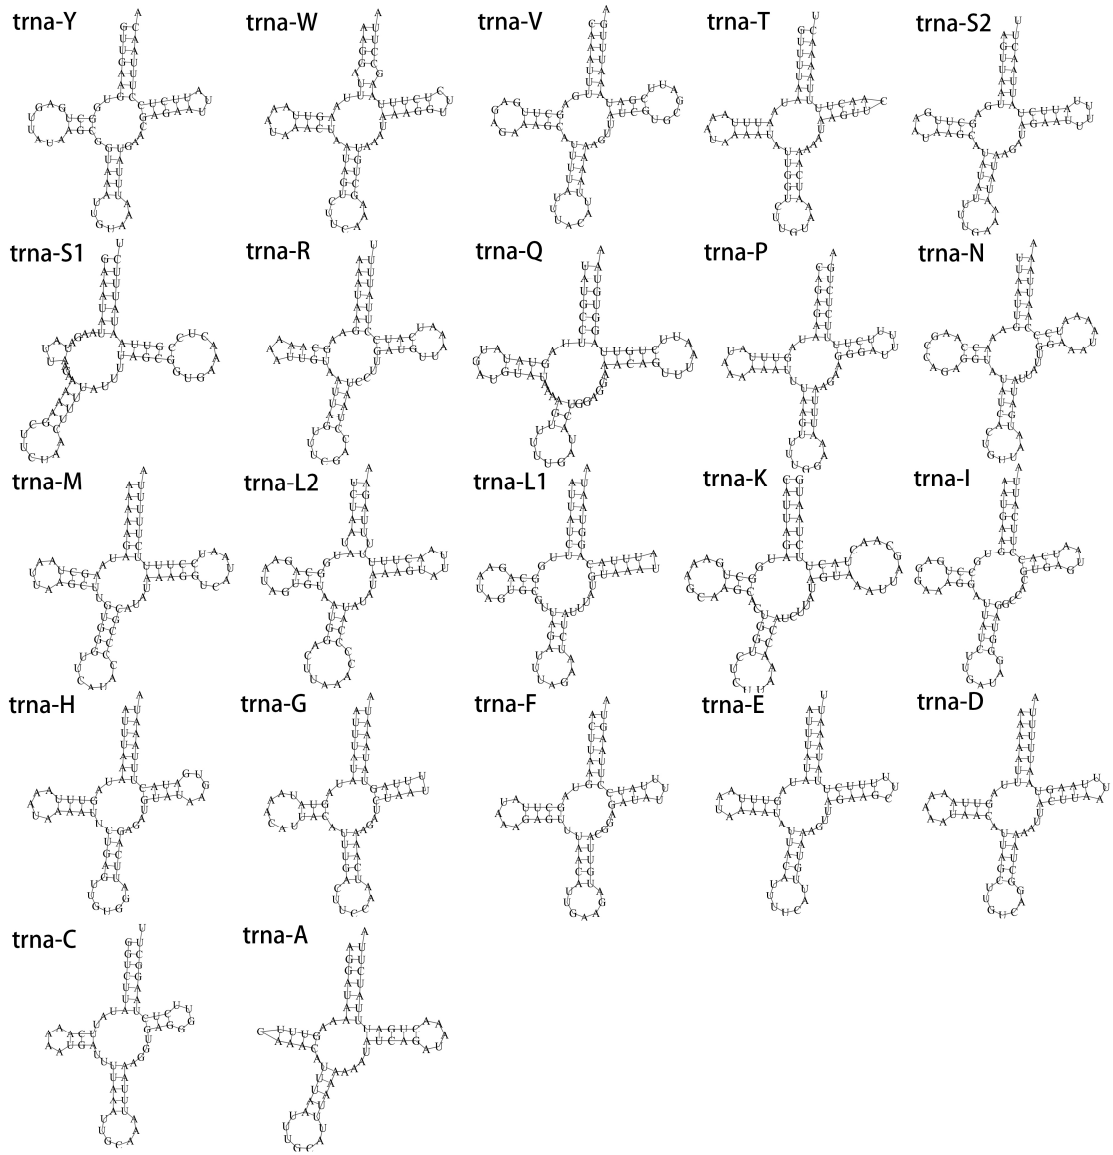

**Figure S2.** The secondary cloverleaf structure for the tRNAs of *Coomaniella copipes*.



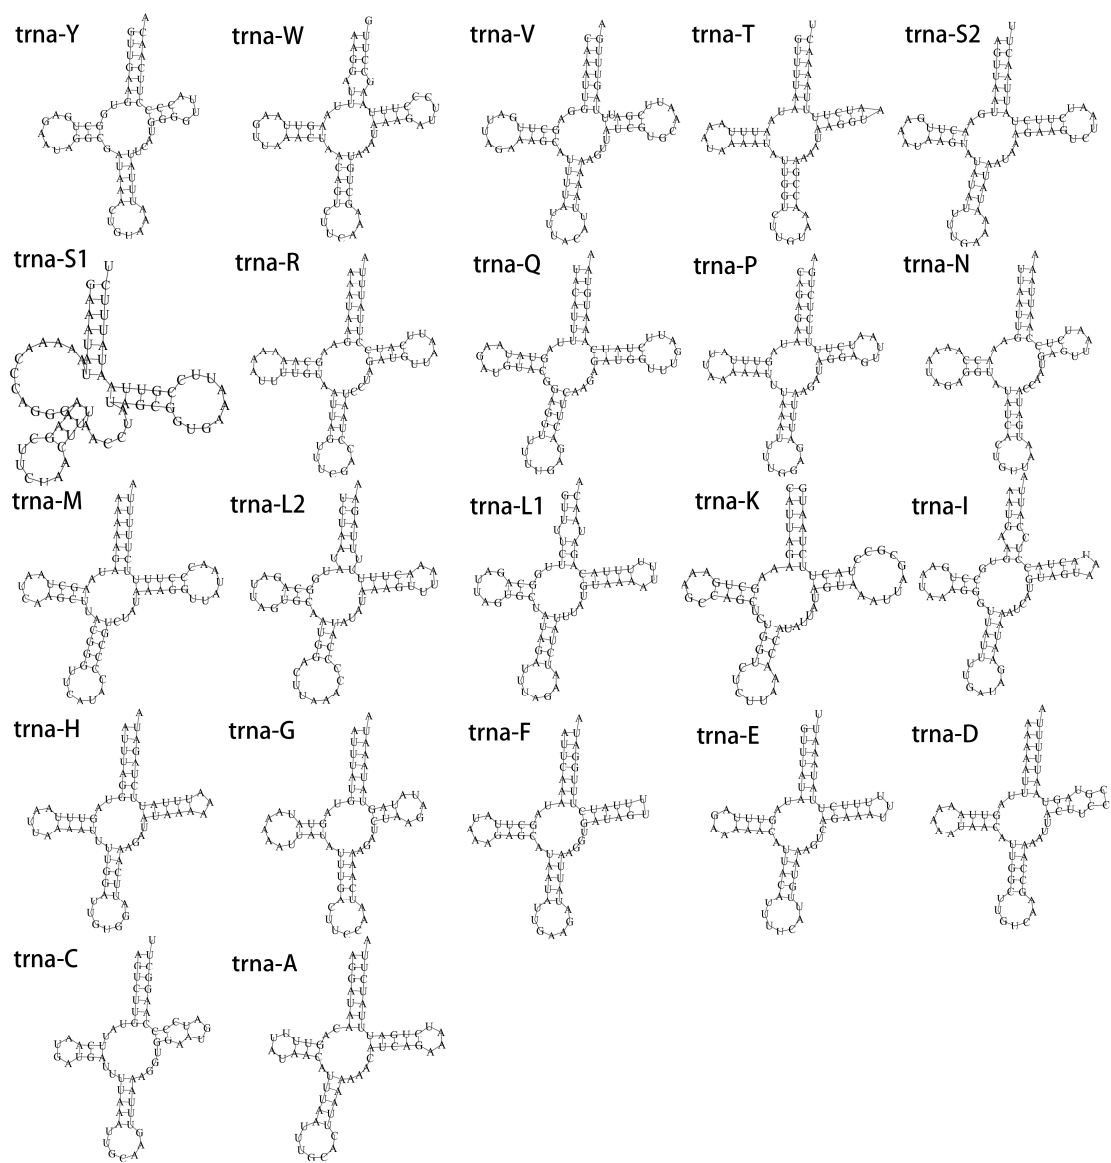

**Figure S4.** The secondary cloverleaf structure for the tRNAs of *Dicerca corrugata*.

**Table S1.** Codon usage of the protein-coding genes in *Coomaniella copipes*.

| Codon  | Count | RSCU |
|--------|-------|------|--------|-------|------|--------|-------|------|--------|-------|------|
| UUU(F) | 291   | 1.6  | UCU(S) | 124   | 2.66 | UAU(Y) | 132   | 1.67 | UGU(C) | 28    | 1.65 |
| UUC(F) | 73    | 0.4  | UCC(S) | 18    | 0.39 | UAC(Y) | 26    | 0.33 | UGC(C) | 6     | 0.35 |
| UUA(L) | 321   | 3.23 | UCA(S) | 97    | 2.08 | UAA(*) | 0     | 0    | UGA(W) | 85    | 1.77 |
| UUG(L) | 35    | 0.35 | UCG(S) | 4     | 0.09 | UAG(*) | 0     | 0    | UGG(W) | 11    | 0.23 |
| CUU(L) | 118   | 1.19 | CCU(P) | 77    | 2.35 | CAU(H) | 51    | 1.46 | CGU(R) | 24    | 1.75 |
| CUC(L) | 23    | 0.23 | CCC(P) | 20    | 0.61 | CAC(H) | 19    | 0.54 | CGC(R) | 0     | 0    |
| CUA(L) | 91    | 0.92 | CCA(P) | 32    | 0.98 | CAA(Q) | 67    | 1.89 | CGA(R) | 29    | 2.11 |
| CUG(L) | 8     | 0.08 | CCG(P) | 2     | 0.06 | CAG(Q) | 4     | 0.11 | CGG(R) | 2     | 0.15 |
| AUU(I) | 326   | 1.7  | ACU(T) | 75    | 1.8  | AAU(N) | 152   | 1.63 | AGU(S) | 25    | 0.54 |
| AUC(I) | 57    | 0.3  | ACC(T) | 17    | 0.41 | AAC(N) | 35    | 0.37 | AGC(S) | 4     | 0.09 |
| AUA(M) | 203   | 1.78 | ACA(T) | 72    | 1.72 | AAA(K) | 80    | 1.52 | AGA(S) | 97    | 2.08 |
| AUG(M) | 25    | 0.22 | ACG(T) | 3     | 0.07 | AAG(K) | 25    | 0.48 | AGG(S) | 4     | 0.09 |
| GUU(V) | 90    | 2.13 | GCU(A) | 83    | 2.05 | GAU(D) | 55    | 1.51 | GGU(G) | 48    | 0.92 |
| GUC(V) | 13    | 0.31 | GCC(A) | 27    | 0.67 | GAC(D) | 18    | 0.49 | GGC(G) | 9     | 0.17 |
| GUA(V) | 55    | 1.3  | GCA(A) | 50    | 1.23 | GAA(E) | 69    | 1.75 | GGA(G) | 130   | 2.49 |
| GUG(V) | 11    | 0.26 | GCG(A) | 2     | 0.05 | GAG(E) | 10    | 0.25 | GGG(G) | 22    | 0.42 |

**Table S2.** Codon usage of the protein-coding genes in *Coomaniella dentata*.

| Codon  | Count | RSCU |
|--------|-------|------|--------|-------|------|--------|-------|------|--------|-------|------|
| UUU(F) | 319   | 1.76 | UCU(S) | 123   | 2.62 | UAU(Y) | 139   | 1.76 | UGU(C) | 33    | 1.89 |
| UUC(F) | 44    | 0.24 | UCC(S) | 18    | 0.38 | UAC(Y) | 19    | 0.24 | UGC(C) | 2     | 0.11 |
| UUA(L) | 391   | 3.88 | UCA(S) | 95    | 2.03 | UAA(*) | 0     | 0    | UGA(W) | 87    | 1.81 |
| UUG(L) | 22    | 0.22 | UCG(S) | 1     | 0.02 | UAG(*) | 0     | 0    | UGG(W) | 9     | 0.19 |
| CUU(L) | 125   | 1.24 | CCU(P) | 73    | 2.23 | CAU(H) | 53    | 1.54 | CGU(R) | 21    | 1.56 |
| CUC(L) | 13    | 0.13 | CCC(P) | 12    | 0.37 | CAC(H) | 16    | 0.46 | CGC(R) | 2     | 0.15 |
| CUA(L) | 48    | 0.48 | CCA(P) | 46    | 1.4  | CAA(Q) | 69    | 1.89 | CGA(R) | 29    | 2.15 |
| CUG(L) | 5     | 0.05 | CCG(P) | 0     | 0    | CAG(Q) | 4     | 0.11 | CGG(R) | 2     | 0.15 |
| AUU(I) | 348   | 1.81 | ACU(T) | 90    | 2.07 | AAU(N) | 162   | 1.71 | AGU(S) | 28    | 0.6  |
| AUC(I) | 36    | 0.19 | ACC(T) | 16    | 0.37 | AAC(N) | 28    | 0.29 | AGC(S) | 3     | 0.06 |
| AUA(M) | 213   | 1.86 | ACA(T) | 67    | 1.54 | AAA(K) | 88    | 1.73 | AGA(S) | 100   | 2.13 |
| AUG(M) | 16    | 0.14 | ACG(T) | 1     | 0.02 | AAG(K) | 14    | 0.27 | AGG(S) | 7     | 0.15 |
| GUU(V) | 99    | 2.4  | GCU(A) | 81    | 2.1  | GAU(D) | 65    | 1.86 | GGU(G) | 44    | 0.87 |
| GUC(V) | 2     | 0.05 | GCC(A) | 17    | 0.44 | GAC(D) | 5     | 0.14 | GGC(G) | 4     | 0.08 |
| GUA(V) | 57    | 1.38 | GCA(A) | 54    | 1.4  | GAA(E) | 77    | 1.9  | GGA(G) | 137   | 2.7  |
| GUG(V) | 7     | 0.17 | GCG(A) | 2     | 0.05 | GAG(E) | 4     | 0.1  | GGG(G) | 18    | 0.35 |

**Table S3.** Codon usage of the protein-coding genes in *Dicerca corrugata*.

| Codon  | Count | RSCU |
|--------|-------|------|--------|-------|------|--------|-------|------|--------|-------|------|
| UUU(F) | 238   | 1.41 | UCU(S) | 77    | 1.86 | UAU(Y) | 118   | 1.41 | UGU(C) | 30    | 1.62 |
| UUC(F) | 100   | 0.59 | UCC(S) | 31    | 0.75 | UAC(Y) | 49    | 0.59 | UGC(C) | 7     | 0.38 |
| UUA(L) | 268   | 2.72 | UCA(S) | 99    | 2.39 | UAA(*) | 0     | 0    | UGA(W) | 78    | 1.63 |
| UUG(L) | 81    | 0.82 | UCG(S) | 8     | 0.19 | UAG(*) | 0     | 0    | UGG(W) | 18    | 0.38 |
| CUU(L) | 114   | 1.16 | CCU(P) | 69    | 2.08 | CAU(H) | 46    | 1.31 | CGU(R) | 21    | 1.47 |
| CUC(L) | 19    | 0.19 | CCC(P) | 19    | 0.57 | CAC(H) | 24    | 0.69 | CGC(R) | 1     | 0.07 |
| CUA(L) | 90    | 0.91 | CCA(P) | 40    | 1.2  | CAA(Q) | 69    | 1.86 | CGA(R) | 25    | 1.75 |
| CUG(L) | 20    | 0.2  | CCG(P) | 5     | 0.15 | CAG(Q) | 5     | 0.14 | CGG(R) | 10    | 0.7  |
| AUU(I) | 289   | 1.57 | ACU(T) | 73    | 1.5  | AAU(N) | 140   | 1.51 | AGU(S) | 25    | 0.6  |
| AUC(I) | 80    | 0.43 | ACC(T) | 42    | 0.86 | AAC(N) | 45    | 0.49 | AGC(S) | 4     | 0.1  |
| AUA(M) | 174   | 1.63 | ACA(T) | 73    | 1.5  | AAA(K) | 69    | 1.38 | AGA(S) | 78    | 1.89 |
| AUG(M) | 40    | 0.37 | ACG(T) | 7     | 0.14 | AAG(K) | 31    | 0.62 | AGG(S) | 9     | 0.22 |
| GUU(V) | 96    | 1.89 | GCU(A) | 84    | 1.83 | GAU(D) | 55    | 1.47 | GGU(G) | 58    | 1.09 |
| GUC(V) | 20    | 0.39 | GCC(A) | 31    | 0.67 | GAC(D) | 20    | 0.53 | GGC(G) | 6     | 0.11 |
| GUA(V) | 74    | 1.46 | GCA(A) | 58    | 1.26 | GAA(E) | 58    | 1.55 | GGA(G) | 116   | 2.19 |
| GUG(V) | 13    | 0.26 | GCG(A) | 11    | 0.24 | GAG(E) | 17    | 0.45 | GGG(G) | 32    | 0.6  |

**Table S4.** Summarized A+T contents of 13 PCGs for the three buprestid species investigated in this study.

| genes        | A+T (%)           |                   |                      |
|--------------|-------------------|-------------------|----------------------|
|              | <i>C. copipes</i> | <i>C. dentata</i> | <i>D. corrugata.</i> |
| <i>nad2</i>  | 74.49             | 76.74             | 70.48                |
| <i>cox1</i>  | 66.23             | 68.71             | 63.36                |
| <i>cox2</i>  | 69.20             | 72.73             | 66.72                |
| <i>atp8</i>  | 79.49             | 81.41             | 77.56                |
| <i>atp6</i>  | 71.26             | 75.26             | 71.26                |
| <i>cox3</i>  | 68.61             | 71.53             | 65.44                |
| <i>nad3</i>  | 74.01             | 77.12             | 67.51                |
| <i>nad5</i>  | 76.98             | 79.07             | 72.85                |
| <i>nad4</i>  | 76.35             | 78.67             | 73.43                |
| <i>nad4l</i> | 77.89             | 77.19             | 74.23                |
| <i>nad6</i>  | 79.80             | 80.78             | 75.25                |
| <i>cytb</i>  | 69.82             | 71.83             | 66.75                |
| <i>nad1</i>  | 74.42             | 75.97             | 71.40                |
